## RESEARCH ARTICLE

# Factors associated with pressure ulcer and dehydration in long-term care settings in Ontario, Canada

Mary Crea-Arsenio<sup>1</sup>, Andrea Baumann<sup>1,2</sup>, Valentina Antonipillai<sup>1</sup>, Noori Akhtar-Danesh<sup>1,2,3\*</sup>

**1** Global Health, McMaster University, Hamilton, Ontario, Canada, **2** School of Nursing, McMaster University, Hamilton, Ontario, Canada, **3** Department of Health Research Methods, Evidence and Impact, McMaster University, Hamilton, Ontario, Canada

\* [daneshn@mcmaster.ca](mailto:daneshn@mcmaster.ca)

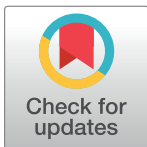

## OPEN ACCESS

**Citation:** Crea-Arsenio M, Baumann A, Antonipillai V, Akhtar-Danesh N (2024) Factors associated with pressure ulcer and dehydration in long-term care settings in Ontario, Canada. PLoS ONE 19(1): e0297588. <https://doi.org/10.1371/journal.pone.0297588>

**Editor:** Peivand Bastani, Flinders University, AUSTRALIA

**Received:** May 11, 2023

**Accepted:** January 8, 2024

**Published:** January 31, 2024

**Copyright:** © 2024 Crea-Arsenio et al. This is an open access article distributed under the terms of the [Creative Commons Attribution License](https://creativecommons.org/licenses/by/4.0/), which permits unrestricted use, distribution, and reproduction in any medium, provided the original author and source are credited.

**Data Availability Statement:** The authors cannot disclose individual level data and have included group level data in the paper and tables. In addition, the dataset from this study is held securely in coded form at ICES. While legal data sharing agreements between ICES and data providers (e.g., healthcare organizations and government) prohibit ICES from making the dataset publicly available, access may be granted to those who meet pre-specified criteria for confidential access, available at [www.ices.on.ca/DAS](http://www.ices.on.ca/DAS) (email: [das@ices.on.ca](mailto:das@ices.on.ca)). The full dataset

## Abstract

Pressure ulcers and dehydration are common conditions among residents of long-term care facilities that result in negative health effects. They have been associated with signs of neglect and increased 30-day mortality among LTC residents. However, they are both preventable and with proper care can be effectively managed and treated. We conducted a retrospective cohort study to examine factors associated with pressure ulcers and dehydration among long-term care residents in the province of Ontario, Canada. Results indicated that close to one-fifth of residents were dehydrated (17.3%) or had a pressure ulcer (18.9%) during the study period. Advanced age was significantly associated with the presence of pressure ulcers and dehydration for both men and women. However, men were more likely to present with a pressure ulcer while women were more likely to exhibit symptoms of dehydration. Study findings also demonstrate the presence of both conditions being higher in municipal and not-for-profit homes compared to for-profit homes. The significant differences observed in relation to home ownership which require further investigation to identify the most relevant factors in explaining these differences. Overall, pressure ulcers and dehydration are preventable conditions that warrant attention from policymakers to ensure quality of care and resident safety are prioritized.

## Introduction

Long-term care (LTC) homes play a critical role in providing essential healthcare services to residents. In Canada, LTC homes are regulated by the government through legislation that sets standards for care. Despite these regulations, numerous reports of poor quality care have been documented over time [1]. Indicators are used to assess the level of care provided to residents. Data are collected through the Resident Assessment Instrument-Minimum Data Set (RAI-MDS) and used to monitor residents in LTC [2]. Two important measures of quality are the development of pressure ulcers and dehydration [3]. These common conditions are preventable and can result in significant negative health effects for residents [4–7]. Moreover, they have been associated with signs of neglect and increased 30-day mortality among LTC

creation plan and underlying analytic code are provided in [S1 File](#), understanding that the computer programs may rely upon coding templates or macros that are unique to ICES and may require modification.

**Funding:** This study was funded by a Canadian Institutes of Health Research (CIHR) Operating Grant - COVID-19 Rapid Research (Application # 447846). The funder website is <https://cihr-irsc.gc.ca/e/193.html>. The funders had no role in study design, data collection and analysis, decision to publish, or preparation of the manuscript.

**Competing interests:** The authors have declared that no competing interests exist.

residents [8–10]. It is vital to understand the factors associated with pressure ulcers and dehydration to identify the burden on care provision in LTC homes across Canada. Using resident-level data, this study examined the key predictors of pressure ulcers and dehydration among LTC residents in Ontario, Canada's most populous province.

Research has focused on individual and organizational factors associated with the development of pressure ulcers and dehydration, both of which are prevalent among LTC residents [6, 11]. Edsberg et al. (p.586) defined pressure ulcers as "localized injury to the skin and/or underlying tissue, usually over a bony prominence, as a result of pressure, or pressure in combination with shear" [12]. Advanced age is a significant risk factor for pressure ulcers, with residents over 80 years of age being at a higher risk [13]. Residents with medical comorbidities such as diabetes and cardiovascular disease and those with low BMI and poor nutritional status, including malnutrition, are also at a higher risk [5, 14, 15]. Incontinence and immobility, including the inability to move and turn independently, are additional risk factors [16, 17].

Similar to pressure ulcers, causes of dehydration are multifactorial. Dehydration occurs when the body loses more fluids than it takes in thus leading to a disruption of normal functions [18]. Older adults are at a higher risk of dehydration due to age-related changes in the body such as decreased sense of thirst and decreased ability to conserve water [4, 18, 19]. The use of certain medications such as diuretics can also increase the risk of dehydration [19]. Moreover, residents with mobility limitations may have difficulty accessing water sources [20]. Chronic illnesses such as diabetes, dementia, and heart failure can increase the risk of dehydration by altering the body's fluid balance [21, 22]. For example, people with diabetes may experience increased urination due to high blood glucose levels. Those with dementia may have difficulty communicating their thirst or may forget to drink fluids [6].

The literature identifies organizational factors such as inadequate staffing and home ownership (i.e., for-profit versus not-for-profit) as factors associated with pressure ulcers and dehydration. Adequate staffing levels, measured as the ratio of staff to residents, are essential to ensure residents receive timely and appropriate care [23]. In Canada, the government sets staffing standards depending on the level of care required. The minimum staffing standard for LTC homes in Ontario is 4.0 hours of direct care per resident per day [24]. Studies have documented that higher nursing staff levels are associated with lower rates of pressure ulcers in LTC homes [25, 26]. Similarly, higher levels of staff can reduce the risk of dehydration, as staff can monitor and encourage residents to consume fluids more regularly [4].

It is well documented that staffing levels vary according to home ownership. Not-for-profit homes have higher staffing levels and better health outcomes compared to for-profit homes [27, 28]. Inadequate staffing can lead to neglect of LTC residents, while inadequate supervision can lead to increased risk of pressure ulcers and dehydration due to delayed recognition and reporting of symptoms. In a recent study by Akhtar-Danesh et al. [8], pressure ulcers and dehydration were examined to assess the relationship between clinical indicators of neglect and mortality among LTC residents. Results indicated that residents living in for-profit homes had 18% increased risk of dying from neglect compared to those living in government-run homes.

A further understanding of the predictors of pressure ulcers and dehydration is needed to identify residents who are at a higher risk and to develop strategies to reduce the incidence and consequences. The latter include increased burden of care for providers as well as health complications and reduced long-term survival for residents. We conducted a retrospective study to examine the factors associated with pressure ulcers and dehydration among residents of LTC homes in Ontario using individual- and organizational-level data. This approach differs from previous studies that have used individual-level data only.

## Materials and methods

### Data sources

This study included data from the residents of LTC homes in Ontario for the period of January 2019 to February 2020. We used population-based health administrative datasets available through the Institute for Clinical Evaluative Sciences (ICES). We also used the RAI-MDS 2.0 dataset which includes information on clinical, functional, and psychosocial characteristics of LTC residents. The datasets were accessed in July 2022 for research purposes and the analysis were completed by December 2022. The demographic data were obtained through the Registered Persons Database (RPDB). Unique encoded identifiers were used to link multiple datasets together.

This analysis included all residents 65 years of age and older. The age variable was grouped as 65–69, 70–74, 75–79, 80–84, and  $\geq 85$  years. The two outcome variables included presence of pressure ulcers and dehydration at each assessment (see [S1 Table](#) for definitions). Number of assessments for residents varied from 1 to 8 during the study period, and residents without any assessment were excluded. In addition to sex and age of residents, the following variables were included in the analysis: region or location of the LTC home as the Central, Southwest, East, or North of Ontario; ownership category of the LTC home as municipal, non-profit, or private (for-profit); and Changes in Health, End-stage disease Symptoms and Signs (CHESS) comorbidity score. The CHESS score varies from 0 (no instability in health) to 5 (high unstable health).

The project was approved by the ICES Privacy and Legal Office. ICES is a prescribed entity under section 45 of Ontario's *Personal Health Information Protection Act* (2004). Section 45 authorizes ICES to collect personal health information without consent for the purpose of analysis or compiling statistical information with respect to the management of, evaluation, or monitoring of the allocation of resources or planning for all or part of the health system. Projects conducted under section 45 do not require informed consent. The Hamilton Integrated Research Ethics Board (HiREB) reviewed and approved the study (HiREB#11526).

### Statistical analysis

We used descriptive statistics to summarize the sample characteristics. The reported descriptive statistics include mean and standard deviation (SD) for the CHESS comorbidity score as the only continuous variable and frequency and percentage for the other variables. The CHESS score for each resident was calculated as the mean of CHESS over the number of assessments. We used an independent two-sample t-test to compare CHESS comorbidity scores between those with and without pressure ulcers and those with and without dehydration. We used a Chi-squared test to compare different levels of each categorical variable for each outcome variable.

To incorporate multiple assessments for each resident, we used a mixed-effect multilevel logistic regression analysis to identify factors associated with pressure ulcers and dehydration. In this hierarchical model, multiple assessments are nested within residents and residents are nested within LTC homes. As a result, variables representing resident and LTC home were used as the random components of the model to accommodate the intraclass correlation within resident and LTC home. The variables in the multilevel logistic regression included sex, age group, CHESS score, region, and type of LTC home ownership. In addition, we noted a quadratic association between CHESS scores and risk of pressure ulcers and dehydration, which indicated introduction of squared values of CHESS score as a variable in our models.

We used a significance level of  $\alpha = 0.05$  in all analysis. Only less than 1% of some variables were missing, and a case-wise deletion approach was used in analysis. All statistical analyses were conducted using Stata/MP 15.1 (Stata Corporation, College Station, TX).

## Results

Analysis included 625 LTC homes in Ontario with 96,590 residents, of which 30,512 (31.6%) were male and 66,078 (68.4%) were female. The majority of residents (54,585; 56.5%) were 85 years of age or older and 50,903 (52.7%) were living in private-owned LTC homes (Table 1). More residents showed symptoms of pressure ulcers than symptoms of dehydration. The distribution of these conditions based on demographic variables showed men were more prone to pressure ulcers and women had more symptoms of dehydration.

In univariate analysis increased age was correlated with an increased risk of pressure ulcers and dehydration ( $p < 0.001$ ). The lowest rates of both conditions were in the Central region of Ontario and the highest rates were in the Southwestern region. The differences in rates were highly significant between the regions ( $p < 0.001$ ). Analysis also showed significant differences between rates of pressure ulcers and dehydration based on LTC home ownership. Incidence

**Table 1. Distribution of pressure ulcer and dehydration based on demographics from January 2019 to February 2020.**

| Category                             | Total         | Pressure Ulcer       |         | Dehydration          |         |
|--------------------------------------|---------------|----------------------|---------|----------------------|---------|
|                                      |               | n (%)                | p-value | n (%)                | p-value |
| <b>Sex</b>                           |               |                      |         |                      |         |
| Male                                 | 30,512        | 6150 (20.2)          | <0.001  | 4767 (15.6)          | <0.001  |
| Female                               | 66,078        | 12,136 (18.4)        |         | 11,894 (18.0)        |         |
| <b>Age group</b>                     |               |                      |         |                      |         |
| 65–69 years                          | 4982          | 831 (16.7)           | <0.001  | 649 (13.0)           | <0.001  |
| 70–74 years                          | 7789          | 1357 (17.4)          |         | 1088 (14.0)          |         |
| 75–79 years                          | 11,480        | 1925 (16.8)          |         | 1718 (15.0)          |         |
| 80–84 years                          | 17,754        | 3301 (18.6)          |         | 2799 (15.8)          |         |
| ≥85 years                            | 54,585        | 10,872 (19.9)        |         | 10,407 (19.1)        |         |
| <b>Age: Mean (SD)</b>                | 84.8 (8.2)    | -                    | <0.001  | -                    | <0.001  |
| Without condition <sup>b</sup>       | -             | 84.7 (8.2)           |         | 84.6 (8.2)           |         |
| With condition <sup>b</sup>          | -             | 85.5 (8.2)           |         | 86.0 (8.0)           |         |
| <b>CHESS<sup>a</sup>: Mean (SD)</b>  | 0.94 (0.69)   | -                    | <0.001  | -                    | <0.001  |
| Without condition <sup>b</sup>       | -             | 0.88 (0.66)          |         | 0.86 (0.65)          |         |
| With condition <sup>b</sup>          | -             | 1.16 (0.76)          |         | 1.31 (0.74)          |         |
| <b>Region</b>                        |               |                      |         |                      |         |
| Central                              | 25,376        | 4026 (15.9)          | <0.001  | 2471 (9.7)           | <0.001  |
| Southwest                            | 32,741        | 7038 (21.5)          |         | 7730 (23.6)          |         |
| East                                 | 26,225        | 4689 (17.9)          |         | 3391 (12.9)          |         |
| North                                | 12,173        | 2516 (20.7)          |         | 3061 (25.1)          |         |
| <b>Long-term care home ownership</b> |               |                      |         |                      |         |
| Municipal                            | 19,894        | 4246 (21.3)          | <0.001  | 3974 (20.0)          | <0.001  |
| Non-profit                           | 25,661        | 4973 (19.4)          |         | 4723 (18.4)          |         |
| Private                              | 50,903        | 9060 (17.8)          |         | 7851 (15.4)          |         |
| <b>Total</b>                         | <b>96,590</b> | <b>18,286 (18.9)</b> | -       | <b>16,661 (17.3)</b> | -       |

<sup>a</sup> Changes in Health, End-stage disease and Symptoms and Signs scale.

<sup>b</sup> The condition indicates pressure ulcer or dehydration.

<https://doi.org/10.1371/journal.pone.0297588.t001>

rates for both conditions were higher in municipal owned homes compared to private owned homes.

### Factors associated with pressure ulcers

Multilevel mixed-effect logistic models were used to show factors associated with pressure ulcers and dehydration. The effect size for each level of a factor is shown with odds ratio (OR) and 95% confidence interval. All the demographic variables were significantly associated with pressure ulcers (Table 2). Female residents were 34% less likely to be diagnosed with pressure ulcers than male residents (OR = 0.66 [95% CI: 0.62, 0.70]). There was no significant differences between pressure ulcers and age for groups younger than 85 years. However, the likelihood of pressure ulcers for residents 85 years and older increased 15% compared to the youngest age group (OR = 1.15 [95% CI: 1.01, 1.32]). The results also showed a quadratic association between pressure ulcers and CHES score.

Among the regions, the highest rate of pressure ulcers was in Southwestern Ontario. The likelihood of LTC residents developing this condition was 34% higher in this region than in Central Ontario. There was no significant difference between the Eastern, Northern, and Central regions. Yet there were significant differences based on home ownership. Compared to homes with private (for-profit) ownership, the likelihood of pressure ulcers was 54% higher for residents in municipal homes (OR = 1.54 [95% CI: 1.26, 1.89]) and 21% higher for residents in non-profit homes (OR = 1.21 [95% CI: 1.01, 1.45]).

**Table 2. Association between demographics and pressure ulcers.**

| Variable                             | With Pressure Ulcer n (%) | Without Pressure Ulcer n (%) | OR <sup>a</sup> (95% CI) | P-value |
|--------------------------------------|---------------------------|------------------------------|--------------------------|---------|
| <b>Sex</b>                           |                           |                              |                          |         |
| Male                                 | 6150 (20.2)               | 24,362 (79.8)                | Reference group          | -       |
| Female                               | 12,136 (18.4)             | 53,942 (81.6)                | 0.66 (0.62, 0.70)        | <0.001  |
| <b>Age group</b>                     |                           |                              |                          |         |
| 65–69 years                          | 831 (16.7)                | 4151 (83.3)                  | Reference group          | -       |
| 70–74 years                          | 1357 (17.4)               | 6432 (82.6)                  | 1.08 (0.92, 1.28)        | 0.361   |
| 75–79 years                          | 1925 (16.8)               | 9555 (83.2)                  | 0.92 (0.79, 1.08)        | 0.308   |
| 80–84 years                          | 3301 (18.6)               | 14,453 (81.4)                | 1.07 (0.92, 1.24)        | 0.370   |
| ≥85 years                            | 10,872 (19.9)             | 43,713 (80.1)                | 1.15 (1.01, 1.32)        | 0.043   |
| <b>CHES<sup>b</sup> scale</b>        |                           |                              |                          |         |
| CHES: Mean (SD)                      | 0.88 (0.66)               | 1.16 (0.76)                  | 1.76 (1.69, 1.84)        | <0.001  |
| CHES-Sq <sup>c</sup>                 | -                         | -                            | 1.02 (1.01, 1.03)        | <0.001  |
| <b>Region</b>                        |                           |                              |                          |         |
| Central                              | 4026 (15.9)               | 21,350 (84.1)                | Reference group          | -       |
| Southwest                            | 7038 (21.5)               | 25,703 (78.5)                | 1.34 (1.13, 1.60)        | 0.001   |
| East                                 | 4689 (17.9)               | 21,536 (82.1)                | 1.06 (0.89, 1.25)        | 0.540   |
| North                                | 2516 (20.7)               | 9657 (79.3)                  | 1.13 (0.90, 1.41)        | 0.286   |
| <b>Long-term care home ownership</b> |                           |                              |                          |         |
| Private                              | 9060 (17.8)               | 41,843 (82.2)                | Reference group          | -       |
| Municipal                            | 4246 (21.3)               | 15,648 (78.7)                | 1.54 (1.26, 1.89)        | <0.001  |
| Non-profit                           | 4973 (19.4)               | 20,688 (80.6)                | 1.21 (1.01, 1.45)        | 0.040   |

<sup>a</sup> Odds ratio.

<sup>b</sup> Changes in Health, End-stage disease and Symptoms and Signs.

<sup>c</sup> CHES scale squared.

<https://doi.org/10.1371/journal.pone.0297588.t002>

Table 3. Association between demographics and dehydration.

| Variable                       | With Dehydration n (%) | Without Dehydration n (%) | OR <sup>a</sup> (95% CI) | P-value |
|--------------------------------|------------------------|---------------------------|--------------------------|---------|
| <b>Sex</b>                     |                        |                           |                          |         |
| Male                           | 4767 (15.6)            | 25,745 (84.4)             | Reference group          | -       |
| Female                         | 11,894 (18.0)          | 54,184 (82.0)             | 1.13 (1.06, 1.20)        | <0.001  |
| <b>Age group</b>               |                        |                           |                          |         |
| 65–69 years                    | 649 (13.0)             | 4333 (87.0)               | Reference group          | -       |
| 70–74 years                    | 1088 (14.0)            | 6701 (86.0)               | 1.04 (0.88, 1.23)        | 0.676   |
| 75–79 years                    | 1718 (15.0)            | 9762 (85.0)               | 1.05 (0.90, 1.23)        | 0.504   |
| 80–84 years                    | 2799 (15.8)            | 14,955 (84.2)             | 1.08 (0.93, 1.25)        | 0.315   |
| ≥85 years                      | 10,407 (19.1)          | 44,178 (80.9)             | 1.34 (1.16, 1.53)        | <0.001  |
| <b>CHESS<sup>b</sup> scale</b> |                        |                           |                          |         |
| CHESS: Mean (SD)               | 84.6 (8.2)             | 86.0 (8.0)                | 1.87 (1.78, 1.96)        | <0.001  |
| CHESS-Sq <sup>c</sup>          | -                      | -                         | 1.14 (1.13, 1.15)        | <0.001  |
| <b>Region</b>                  |                        |                           |                          |         |
| Central                        | 2471 (9.7)             | 22,905 (90.3)             | Reference group          | -       |
| Southwest                      | 7730 (23.6)            | 25,011 (76.4)             | 1.42 (1.09, 1.86)        | 0.009   |
| East                           | 3391 (12.9)            | 22,834 (87.1)             | 1.03 (0.81, 1.31)        | 0.802   |
| North                          | 3061 (25.1)            | 9112 (74.9)               | 1.38 (0.98, 1.94)        | 0.067   |
| <b>LTC home ownership</b>      |                        |                           |                          |         |
| Private                        | 7851 (15.4)            | 43,052 (84.6)             | Reference group          | -       |
| Municipal                      | 3974 (20.0)            | 15,920 (80.0)             | 2.06 (1.18, 3.59)        | 0.011   |
| Non-profit                     | 4723 (18.4)            | 20,938 (81.6)             | 1.15 (0.71, 1.85)        | 0.564   |

<sup>a</sup> Odds ratio.

<sup>b</sup> Changes in Health, End-stage disease and Symptoms and Signs.

<sup>c</sup> CHESS scale squared.

<https://doi.org/10.1371/journal.pone.0297588.t003>

## Factors associated with dehydration

Factors associated with dehydration are shown in Table 3. There was a significant association between sex and dehydration where the likelihood of dehydration was 13% higher for female residents [OR = 1.13 (95%CI: 1.06, 1.20)]. Similar to pressure ulcers, residents 85 years and older were more likely to suffer from dehydration compared to the youngest age groups [OR = 1.34 (95%CI: 1.16, 1.53)]. In addition, both linear and quadratic components of CHESS score were highly associated with dehydration ( $p < 0.001$ ). The highest risk of dehydration was observed in Southwestern Ontario [OR = 1.42 (95%CI: 1.09, 1.86)]. In addition, risk of dehydration in municipal homes were more than twice compared to private homes (OR = 2.06 [95% CI: 1.18, 3.59]).

## Discussion

This retrospective study used administrative organizational-level and resident-level data to examine factors associated with pressure ulcers and dehydration among LTC residents in Ontario, Canada. Results indicated that close to one-fifth of residents were dehydrated (17.3%) or had a pressure ulcer (18.9%) during the study period. Namasivayam-MacDonald et al. [19] likewise found that daily fluid intake was considerably less than the recommended amount for residents of LTC homes in four provinces, including Ontario. However, in contrast to our findings, Woo et al. [29] reported a one-year pressure ulcer prevalence rate of 8.9% in LTC homes in Ontario. The presence of pressure ulcers and dehydration vary according to age, sex,



geographical region, and home ownership. Our study corroborates existing evidence that advanced age is significantly associated with the presence of pressure ulcers and dehydration for both men and women [4, 19]. However, we found men were more likely to present with a pressure ulcer while women were more likely to exhibit symptoms of dehydration.

The study findings also demonstrate significant differences between pressure ulcers and dehydration based on LTC home ownership with the presence of both conditions being higher in municipal and not-for-profit homes compared to for-profit homes. These findings contrast with other literature that demonstrates poor outcomes in for-profit homes compared to not-for-profit and government-run homes [8, 9, 27, 30–32]. Systematic reviews have reported inconsistent findings related to the relationship between home ownership and quality indicators such as pressure ulcers, dehydration, falls and infection rates [33, 34]. In a study conducted in the Republic of Korea, researchers used pressure ulcers as a proxy for quality of care to understand the impact of increased privatization in the LTC sector. Results revealed that residents in private LTC homes had an appreciably higher risk of pressure ulcers than those in government-run facilities [35]. In contrast, a Canadian study found higher rates of pressure ulcers and dehydration in government-run homes compared to for-profit homes [8]. However, the researchers indicated that the odds of dying from one of these conditions was greater among residents in for-profit homes [8].

Consistent findings in the literature relate to the relationship between staffing levels and home ownership. Studies show that publicly owned facilities have higher staffing levels and better health outcomes than privately owned facilities [27, 28]. For example, research from the US has demonstrated that increased registered nurse (RN) staff hours result in decreased pressure ulcers, catheterization, urinary tract infections, ADL decline, nutritional supplements, and hospitalizations [36, 37]. Similarly, an increase in licensed practical nurse (LPN) staff hours is associated with decreases in quality care indicators including pressure ulcers and use of physical restraints [38]. In Canada, residents living in government-run facilities receive more direct care per day compared to those living in for-profit homes [30, 31]. Given the lack of consistency in staffing levels across different types of homes there may be underreporting of these quality indicators in homes with lower capacity [31]. Further investigation is required to assess the relationship between home ownership, staffing levels and quality of care.

## Limitations

There are several limitations to the data set used in our analysis. As with all administrative databases, this study is subject to coding error. The nature of the study means we cannot make predictions or infer causality; we can only report associations. Although RAI reporting is mandatory, the reporting is not consistent/standardized over time.

## Conclusions

Pressure ulcers and dehydration are preventable conditions that warrant attention from policymakers to ensure quality of care and resident safety are prioritized. Results of this study indicate higher rates of pressure ulcers and dehydration in municipal and not-for-profit homes compared to for-profit homes. However, the significant differences observed require further investigation to identify the most relevant factors in preventing these two conditions.

## Supporting information

**S1 Table. Definitions of pressure ulcer and dehydration.**  
(DOCX)

**S1 File. Statistical codes.**  
(TXT)

## Acknowledgments

This study was supported by ICES. Parts of this material are based on data and information compiled and provided by the Canadian Institute for Health Information (CIHI). This study was also supported by the Ontario Health Data Platform (OHDP), a Province of Ontario initiative to support Ontario's ongoing response to COVID-19 and its related impacts. The analyses, conclusions, opinions, results and conclusions reported in this paper are solely those of the authors. No endorsement by the ICES, CIHI, OHDP, their partners, or the Province of Ontario is intended or should be inferred. The authors would like to thank Mike Campitelli and Branavan Sivapathasundaram at the ICES for preparing the extracted data for analysis.

## Author Contributions

**Conceptualization:** Mary Crea-Arsenio, Andrea Baumann, Valentina Antonipillai, Noori Akhtar-Danesh.

**Formal analysis:** Noori Akhtar-Danesh.

**Funding acquisition:** Andrea Baumann.

**Investigation:** Mary Crea-Arsenio, Andrea Baumann, Valentina Antonipillai, Noori Akhtar-Danesh.

**Methodology:** Mary Crea-Arsenio, Andrea Baumann, Valentina Antonipillai, Noori Akhtar-Danesh.

**Project administration:** Mary Crea-Arsenio, Andrea Baumann.

**Software:** Noori Akhtar-Danesh.

**Supervision:** Noori Akhtar-Danesh.

**Writing – original draft:** Mary Crea-Arsenio, Andrea Baumann, Noori Akhtar-Danesh.

**Writing – review & editing:** Mary Crea-Arsenio, Andrea Baumann, Valentina Antonipillai, Noori Akhtar-Danesh.

## References

1. Oldenburger D, Baumann A, Crea-Arsenio M, Deber R, Baba V. COVID-19 Issues in Long-Term Care in Ontario: A Document Analysis. *Healthc Policy*. 2022; 17(SP):53–65. <https://doi.org/10.12927/hcpol.2022.26854> PMID: 35848556.
2. Hutchinson AM, Milke DL, Maisey S, Johnson C, Squires JE, Teare G, et al. The Resident Assessment Instrument-Minimum Data Set 2.0 quality indicators: a systematic review. *BMC Health Serv Res*. 2010; 10:166. Epub 20100616. <https://doi.org/10.1186/1472-6963-10-166> PMID: 20550719.
3. Vance J, Cefalu JE, Cefalu CA. When do poor outcomes constitute poor care? Making the case for unpreventable outcomes in long-term care residents. *Annals of Long-Term Care*. 2015; 23(1).
4. Bunn D, Jimoh F, Wilsher SH, Hooper L. Increasing fluid intake and reducing dehydration risk in older people living in long-term care: a systematic review. *J Am Med Dir Assoc*. 2015; 16(2):101–13. Epub 20141212. <https://doi.org/10.1016/j.jamda.2014.10.016> PMID: 25499399.
5. Neziraj M, Andersson M, Hellman P, Axelsson M, Kumlien C. Prevention of pressure ulcers, malnutrition, poor oral health and falls in nursing homes: A focus group study with nurse aides, registered nurses and managers. *International Journal of Nursing Advances*. 2021; 3:100056. <https://doi.org/10.1016/j.ijnsa.2021.100056>



6. Paulis SJC, Everink IHJ, Halfens RJG, Lohrmann C, Schols J. Prevalence and Risk Factors of Dehydration Among Nursing Home Residents: A Systematic Review. *J Am Med Dir Assoc*. 2018; 19(8):646–57. Epub 20180706. <https://doi.org/10.1016/j.jamda.2018.05.009> PMID: 30056949.
7. Yap TL, Kennerly SM, Horn SD, Bergstrom N, Datta S, Colon-Emeric C. TEAM-UP for quality: a cluster randomized controlled trial protocol focused on preventing pressure ulcers through repositioning frequency and precipitating factors. *BMC Geriatr*. 2018; 18(1):54. Epub 20180220. <https://doi.org/10.1186/s12877-018-0744-0> PMID: 29463211.
8. Akhtar-Danesh N, Baumann A, Crea-Arsenio M, Antonipillai V. Frequency of Neglect and Its Effect on Mortality in Long-Term Care before and during the COVID-19 Pandemic. *Healthc Policy*. 2022; 17 (SP):107–21. <https://doi.org/10.12927/hcpol.2022.26851> PMID: 35848559.
9. Akhtar-Danesh N, Baumann A, Crea-Arsenio M, Antonipillai V. COVID-19 excess mortality among long-term care residents in Ontario, Canada. *PLoS One*. 2022; 17(1):e0262807. Epub 20220120. <https://doi.org/10.1371/journal.pone.0262807> PMID: 35051237.
10. Thomas JM, Cooney LM Jr., Fried TR. Systematic review: Health-related characteristics of elderly hospitalized adults and nursing home residents associated with short-term mortality. *J Am Geriatr Soc*. 2013; 61(6):902–11. Epub 20130520. <https://doi.org/10.1111/jgs.12273> PMID: 23692412.
11. Jaul E, Barron J, Rosenzweig JP, Menczel J. An overview of co-morbidities and the development of pressure ulcers among older adults. *BMC Geriatr*. 2018; 18(1):305. Epub 20181211. <https://doi.org/10.1186/s12877-018-0997-7> PMID: 30537947.
12. Edsberg LE, Black JM, Goldberg M, McNichol L, Moore L, Sieggreen M. Revised National Pressure Ulcer Advisory Panel Pressure Injury Staging System: Revised Pressure Injury Staging System. *J Wound Ostomy Continence Nurs*. 2016; 43(6):585–97. <https://doi.org/10.1097/WON.000000000000281> PMID: 27749790.
13. Coleman S, Gorecki C, Nelson EA, Closs SJ, Defloor T, Halfens R, et al. Patient risk factors for pressure ulcer development: systematic review. *Int J Nurs Stud*. 2013; 50(7):974–1003. <https://doi.org/10.1016/j.ijnurstu.2012.11.019> PMID: 23375662
14. Bergstrom N, Horn SD, Rapp M, Stern A, Barrett R, Watkiss M, et al. Preventing Pressure Ulcers: A Multisite Randomized Controlled Trial in Nursing Homes. *Ont Health Technol Assess Ser*. 2014; 14 (11):1–32. Epub 20141001. PMID: 26330893.
15. White-Chu EF, Flock P, Struck B, Aronson L. Pressure ulcers in long-term care. *Clin Geriatr Med*. 2011; 27(2):241–58. <https://doi.org/10.1016/j.cger.2011.02.001> PMID: 21641509.
16. Bliss DZ, Mathiason MA, Gurchik O, Savik K, Eberly LE, Fisher J, et al. Incidence and Predictors of Incontinence-Associated Skin Damage in Nursing Home Residents With New-Onset Incontinence. *J Wound Ostomy Continence Nurs*. 2017; 44(2):165–71. <https://doi.org/10.1097/WON.000000000000313> PMID: 28267124.
17. Stone A. Preventing Pressure Injuries in Nursing Home Residents Using a Low-Profile Alternating Pressure Overlay: A Point-of-Care Trial. *Advances in Skin & Wound Care*. 2020; 33(10):533–9. <https://doi.org/10.1097/01.ASW.0000695756.80461.64> PMID: 32941227
18. Masot O, Lavedan A, Nuin C, Escobar-Bravo MA, Miranda J, Botigue T. Risk factors associated with dehydration in older people living in nursing homes: Scoping review. *Int J Nurs Stud*. 2018; 82:90–8. Epub 20180327. <https://doi.org/10.1016/j.ijnurstu.2018.03.020> PMID: 29626702.
19. Namasivayam-MacDonald AM, Slaughter SE, Morrison J, Steele CM, Carrier N, Lengyel C, et al. Inadequate fluid intake in long term care residents: prevalence and determinants. *Geriatr Nurs*. 2018; 39(3):330–5. Epub 20180105. <https://doi.org/10.1016/j.gerinurse.2017.11.004> PMID: 29310831.
20. Reed PS, Zimmerman S, Sloane PD, Williams CS, Boustani M. Characteristics associated with low food and fluid intake in long-term care residents with dementia. *Gerontologist*. 2005; 45 Spec No 1 (1):74–80. [https://doi.org/10.1093/geront/45.suppl\\_1.74](https://doi.org/10.1093/geront/45.suppl_1.74) PMID: 16230753.
21. Begum MN, Johnson CS. A review of the literature on dehydration in the institutionalized elderly. *e-SPEN, the European e-Journal of Clinical Nutrition and Metabolism*. 2010; 5(1):e47–e53. <https://doi.org/10.1016/j.eclnm.2009.10.007>
22. Hooper L, Bunn DK, Downing A, Jimoh FO, Groves J, Free C, et al. Which Frail Older People Are Dehydrated? The UK DRIE Study. *J Gerontol A Biol Sci Med Sci*. 2016; 71(10):1341–7. Epub 20151109. <https://doi.org/10.1093/gerona/glv205> PMID: 26553658.
23. Grignon M, Hothi H. Life and death in long-term care: Are we learning the wrong lessons from COVID-19? IRPP Study No. 89. Montreal: Institute for Research on Public Policy, 2023 Contract No.: IRPP Study No. 89.
24. Ministry of Long-Term Care. A better place to live, a better place to work. Ontario's Long-Term Care Staffing Plan (2021–2025). Toronto: Ontario Ministry of Long-Term Care, 2020.

25. Horn SD, Buerhaus P, Bergstrom N, Smout RJ. RN staffing time and outcomes of long-stay nursing home residents: pressure ulcers and other adverse outcomes are less likely as RNs spend more time on direct patient care. *Am J Nurs*. 2005; 105(11):58–70; quiz 1. <https://doi.org/10.1097/0000446-200511000-00028> PMID: 16264305.
26. Jutkowitz E, Landsteiner A, Ratner E, Shippee T, Madrigal C, Ullman K, et al. Effects of Nurse Staffing on Resident Outcomes in Nursing Homes: A Systematic Review. *J Am Med Dir Assoc*. 2023; 24(1):75–81.e11. Epub 20221205. <https://doi.org/10.1016/j.jamda.2022.11.002> PMID: 36470321.
27. Berta W, Laporte A, Zarnett D, Valdmanis V, Anderson G. A pan-Canadian perspective on institutional long-term care. *Healthc Policy*. 2006; 79(2–3):175–94. <https://doi.org/10.1016/j.healthpol.2005.12.006> PMID: 16430989
28. Boscart VM, Sidani S, Poss J, Davey M, d'Avernas J, Brown P, et al. The associations between staffing hours and quality of care indicators in long-term care. *BMC Health Serv Res*. 2018; 18(1):750. Epub 20181003. <https://doi.org/10.1186/s12913-018-3552-5> PMID: 30285716.
29. Woo KY, Sears K, Almost J, Wilson R, Whitehead M, VanDenKerkhof EG. Exploration of pressure ulcer and related skin problems across the spectrum of health care settings in Ontario using administrative data. *Int Wound J*. 2017; 14(1):24–30. Epub 20151120. <https://doi.org/10.1111/iwj.12535> PMID: 26584833.
30. Hsu AT, Berta W, Coyte PC, Laporte A. Staffing in Ontario's Long-Term Care Homes: Differences by Profit Status and Chain Ownership. *Can J Aging*. 2016; 35(2):175–89. <https://doi.org/10.1017/S0714980816000192> PMID: 27223577.
31. Poss J, McGrail K, McGregor MJ, Ronald LA. Long-Term Care Facility Ownership and Acute Hospital Service Use in British Columbia, Canada: A Retrospective Cohort Study. *J Am Med Dir Assoc*. 2020; 21(10):1490–6. Epub 20200706. <https://doi.org/10.1016/j.jamda.2020.04.034> PMID: 32646822.
32. Tanuseputro P, Chalifoux M, Bennett C, Gruneir A, Bronskill SE, Walker P, et al. Hospitalization and Mortality Rates in Long-Term Care Facilities: Does For-Profit Status Matter? *J Am Med Dir Assoc*. 2015; 16(10):874–83. <https://doi.org/10.1016/j.jamda.2015.06.004> PMID: 26433862.
33. Comondore VR, Devereaux PJ, Zhou Q, Stone SB, Busse JW, Ravindran NC, et al. Quality of care in for-profit and not-for-profit nursing homes: systematic review and meta-analysis. *BMJ*. 2009; 339:b2732. Epub 20090804. <https://doi.org/10.1136/bmj.b2732> PMID: 19654184.
34. Hillmer MP, Wodchis WP, Gill SS, Anderson GM, Rochon PA. Nursing home profit status and quality of care: is there any evidence of an association? *Med Care Res Rev*. 2005; 62(2):139–66. <https://doi.org/10.1177/1077558704273769> PMID: 15750174.
35. Chun S-Y, Park H, Kim W, Joo Y-J, Lee T-H, Park E-C. Ownership of Long-Term Care Facility and Incidence of Pressure Ulcers among Republic of Korea. *Health Policy and Management*. 2020; 30(4):522–30.
36. Lee HY, Blegen MA, Harrington C. The effects of RN staffing hours on nursing home quality: a two-stage model. *Int J Nurs Stud*. 2014; 51(3):409–17. Epub 20131014. <https://doi.org/10.1016/j.ijnurstu.2013.10.007> PMID: 24182619.
37. Spilsbury K, Hewitt C, Stirk L, Bowman C. The relationship between nurse staffing and quality of care in nursing homes: a systematic review. *Int J Nurs Stud*. 2011; 48(6):732–50. Epub 20110311. <https://doi.org/10.1016/j.ijnurstu.2011.02.014> PMID: 21397229.
38. Harrington C, Choiniere J, Goldmann M, Jacobsen FF, Lloyd L, McGregor M, et al. Nursing home staffing standards and staffing levels in six countries. *J Nurs Scholarsh*. 2012; 44(1):88–98. Epub 20120216. <https://doi.org/10.1111/j.1547-5069.2011.01430.x> PMID: 22340814.
